RESEARCH ARTICLE

# Genome-Wide Identification and Expression Analysis of *MRLK* Family Genes Associated with Strawberry (*Fragaria vesca*) Fruit Ripening and Abiotic Stress Responses

Qing Zhang<sup>1,2,3</sup>, Meiru Jia<sup>1</sup>, Yu Xing<sup>2,3</sup>, Ling Qin<sup>2,3\*</sup>, Bingbing Li<sup>1,2</sup>, Wensuo Jia<sup>1\*</sup>

**1** College of Horticulture, China Agriculture University, Beijing, China, **2** College of Plant Science and Technology, Beijing University of Agriculture, Key Laboratory of New Technology in Agricultural Application of Beijing, Beijing University of Agriculture, Beijing, China, **3** Beijing Collaborative innovation center for eco-environmental improvement with forestry and fruit trees, Beijing, China

\* [jiaqs@cau.edu.cn](mailto:jiaqs@cau.edu.cn) (WJ); [qinlingbac@126.com](mailto:qinlingbac@126.com) (LQ)

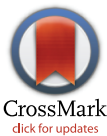

OPEN ACCESS

**Citation:** Zhang Q, Jia M, Xing Y, Qin L, Li B, Jia W (2016) Genome-Wide Identification and Expression Analysis of *MRLK* Family Genes Associated with Strawberry (*Fragaria vesca*) Fruit Ripening and Abiotic Stress Responses. PLoS ONE 11(9): e0163647. doi:10.1371/journal.pone.0163647

**Editor:** Jin-Song Zhang, Institute of Genetics and Developmental Biology Chinese Academy of Sciences, CHINA

**Received:** June 22, 2016

**Accepted:** September 12, 2016

**Published:** September 29, 2016

**Copyright:** © 2016 Zhang et al. This is an open access article distributed under the terms of the [Creative Commons Attribution License](https://creativecommons.org/licenses/by/4.0/), which permits unrestricted use, distribution, and reproduction in any medium, provided the original author and source are credited.

**Data Availability Statement:** All relevant data are within the paper and its Supporting Information files.

**Funding:** This work was supported by the National Natural Science Foundation (31471851; 31672133; 31572104), the Scientific Research Program of Beijing Municipal Commission of Education (PXM2016-014207-000008; CEFF-PXM2016-014207-000038) and Fok Ying-Tong Education Foundation (151027). The funders had no role in

## Abstract

Malectin-like domain-containing receptor-like kinases (MRLK) constitute a large and divergent family of proteins in plants; however, little is known about the role of MRLKs in fruit growth and development. In this study, we characterized *MRLK* family genes in diploid strawberry, *Fragaria vesca*. Based on an analysis of malectin-like domain and a search in the strawberry genome and NCBI database, we identified 62 *FvMRLKs* in the strawberry genome, and classified these genes into six subfamilies with distinct malectin domains in the extracellular regions of the encoded proteins. Gene expression analysis indicated that more than 80% of the *FvMRLKs* were expressed in various tissues, with higher levels in roots than in other organs. Thirty-three *FvMRLKs* were found to be expressed in fruits during the early stages of development, and over 60% of these exhibited dramatic decreases in expression during fruit growth and development. Moreover, the expression of some *FvMRLKs* was sensitive to both environmental and internal cues that play critical roles in regulating strawberry fruit development and ripening. Collectively, this study provides valuable insight into the *FvMRLKs* gene family and its role in regulating strawberry fruit development and ripening.

## Introduction

Receptor-like kinases (RLKs) in plants comprise a large family of proteins with putative amino-terminal extracellular domains and carboxyl-terminal intracellular kinase domains [1, 2]. A phylogenetic analysis of the model plant *Arabidopsis thaliana* identified more than 610 proteins containing RLK domain sequences. RLKs can be further divided into more than 44 subfamilies based on their extracellular domain structures [3, 4]; plant RLKs were initially categorized into three major types, the S-domain type, the leucine-rich repeat type, and the

study design, data collection and analysis, decision to publish, or preparation of the manuscript.

**Competing Interests:** The authors have declared that no competing interests exist.

**Abbreviations:** SG, small green stage; MG, medium green stage; LG, large green stage; TN, turn stage; FR, full red stage.

epidermal growth factor (EGF)-like type [5, 6]. CrRLK1 was later identified in *Catharanthus roseus* and represents a unique subfamily of RLKs [5].

The *Arabidopsis* genome contains 17 *CrRLK1*-like *RLK* genes. The *CrRLK1L* subfamily can be further classified into six subclasses [7, 8]. The functions of several members of the *CrRLK1L* subfamily have been determined in *Arabidopsis* [7]. *Feronia* (FER) was first identified for its role in fertilization [9]. Recent research demonstrated that FER directly interacts with guanine nucleotide exchange factors (ROGGEFs), which regulate RHO GTPase signaling and mediate the production of reactive oxygen species (ROS) at the entrance point of the female gametophyte, which induces pollen tube rupture and sperm release [10–12]. Besides its critical roles in fertilization, FER has been suggested to be a key regulator of the crosstalk among abscisic acid (ABA), brassinosteroids (BR), and ethylene signaling [13]. Moreover, FER was reported to be involved in a variety of important processes, such as root hair elongation [14, 15], ethylene biosynthesis [16], starch accumulation [17], seed development [18], pathogen resistance [19, 20], and vegetative growth [21–23]. Theseus 1 (THE1) was identified in a screen for suppressors that attenuated the short hypocotyl phenotype of dark-grown seedlings [24–26]. THE1 functions as a cell wall integrity sensor that mediates the disruption of cellulose synthesis [24–26]. Named after the male consort of *Feronia*, Anxur1 (ANX1) and Anxur2 (ANX2) are closely related to FER. Like FER, ANX1 and ANX2 are pollen-specific CrRLK1Ls that play important roles in the regulation of pollen tube rupture and sperm release [27]. HERCULES 1 (HERK1) is also a member of the CrRLK1L subfamily and functions redundantly with THE1 to regulate plant growth and development [21, 22].

Acting as RLKs, CrRLK1Ls signaling is based on a reaction with specific ligands in the extracellular region of their conserved domains; therefore, analysis of the conserved domains of CrRLK1Ls is particularly important for a deeper understanding of the mechanisms underlying CrRLK1L signaling. Sequence analysis of FER, THE1, ANXS, HERK1, and several other closely related proteins indicated that an important feature of their extracellular sequences is the existence of a conserved domain, named the malectin or malectin-like domain. Malectin is a membrane-anchored protein of the endoplasmic reticulum. It recognizes and binds Glc2-N-glycan, thereby regulating the production and secretion of N-glycosylated proteins [28–30]. The existence of the malectin domain provides an important clue for exploring the signaling mechanisms of RLKs. CrRLK1Ls are commonly referred to as malectin domain-containing RLKs [7, 25, 31]. Given the importance of CrRLK1Ls, genome-wide identification and analysis of the *CrRLK1L* gene subfamily has been conducted in several plant species, including *Oryza sativa* (rice) [32] and *Gossypium* (cotton) [33]. As mentioned above, the *Arabidopsis* genome contains 17 *CrRLK1*-like *RLK* genes. However, a search for malectin and malectin-like domains in *Arabidopsis* revealed more than 30 genes, indicating that malectin and malectin-like domain containing RLKs exist outside of the *CrRLK1L* gene family. Therefore, it is more suitable to categorize the malectin and malectin-like domain containing RLKs into a unique subfamily (referred as *MRLK* subfamily) and a genome-wide analysis of this gene subfamily would provide insight into their functions in plants.

Flesh fruit production accounts for a substantial fraction of the world's agricultural output. Since regulating fruit development and ripening is a key challenge in fleshy fruit production, understanding the molecular basis for fruit development and ripening is of great interest. While signaling mechanisms have been extensively studied for the regulation of plant growth and development and responses to abiotic and biotic stresses, limited information is available in fleshy fruits, especially non-climacteric fruits. Fleshy fruits are physiologically classified as climacteric or non-climacteric. Strawberry is becoming a model plant for basic research of non-climacteric fruits (i.e., fruits that ripen without increased ethylene production). To explore the molecular basis of strawberry plant growth and development, with a focus on fruit growth

and development, we conducted a genome-wide analysis of the *MRLK* subfamily in diploid strawberry, *Fragaria vesca*. We found that the *F. vesca* genome contains more than 60 *MRLKs*, about 50% of which are expressed in the fruit. Among the *MRLKs* expressed in fruit, more than 60% were expressed at relatively high levels only in the early stages of fruit development, with transcript levels declining dramatically as fruit development progressed. Furthermore, many of these genes were sensitive to both environmental and internal cues controlling fruit development and ripening. These findings provide valuable insight into the roles of *FvMRLKs* in the regulation of flesh fruit development and ripening.

## Materials and Methods

### Identification of MRLK proteins in *Fragaria vesca*

Annotated strawberry MRLK proteins were identified in the following three public databases: the National Center for Biotechnology Information (NCBI; <http://www.ncbi.nlm.nih.gov/>), the Strawberry Genome Browser (<https://strawberry.plantandfood.co.nz/index.html>), and PLAZA (<http://bioinformatics.psb.ugent.be/plaza/>). Specifically, to identify the *MRLK* gene family, we first identified the HMM profile of the malectin domain (pfam11721) and malectin-like domain (pfam12819) from the protein families database (<http://pfam.janelia.org/>); Based on the HMM profile of the malectin and malectin-like domains, we obtained the MRLK protein candidates by searching the database of strawberry genome (<https://strawberry.plantandfood.co.nz/index.html>) and the MRLK protein candidates were further identified and characterized in the NCBI database for a final confirmation of the MRLK proteins. The lengths of amino acid sequences, molecular weights, and isoelectric points of the putative proteins were calculated using tools provided at the ExPasy website (<http://web.expasy.org/protparam/>). The signal peptides of the strawberry MRLK proteins were predicted based on the SignalP 4.1 server (<http://www.cbs.dtu.dk/services/SignalP/>) [34]. Information of the *Arabidopsis* *MRLK* gene family was obtained from The Arabidopsis Information Resource (<http://www.arabidopsis.org/>) and used for the comparative study.

### Phylogenetic analysis and classification of the MRLK protein family in *Fragaria vesca*

All identified *MRLK* genes (*FvMRLKs*) in *Fragaria vesca* were classified into different groups based on the alignment of *FvMRLK* proteins using ClustalX 2.1 with default settings [35]. The phylogenetic trees were constructed using the neighbor-joining method implemented in MEGA 5.0 [36]. Bootstrap values were calculated for 1000 iterations.

### Chromosomal location of *FvMRLKs*

All *FvMRLK* genes were mapped to strawberry chromosomes based on information available at the National Center for Biotechnology Information (NCBI; <http://www.ncbi.nlm.nih.gov/>). The map was drafted using Mapchart software (<http://www.wageningenur.nl/en.htm>) [37]. Tandem duplicated *FvMRLK* genes in the strawberry genome were identified by checking their physical locations on individual chromosomes and were defined as adjacent paralogous genes with no more than one intervening gene. Physical chromosomal locations were graphically represented to scale on the seven chromosomes.

### Analysis and distribution of conserved motifs and exon-intron structures

The exon-intron organization of the *FvMRLK* genes was determined using PLAZA (<http://bioinformatics.psb.ugent.be/plaza/>). The Fancy Gene online tool (<http://bio.ieo.eu/fancygene/>)

was used to illustrate the exon-intron structure of the *FvMRLKs* [38]. The Expectation Maximization for Motif Elicitation online program (<http://meme-suite.org/>) [39] for DNA and protein sequence analysis was used to identify conserved motifs in the 62 *FvMRLK*-deduced proteins. The optimized parameters of Expectation Maximization for Motif Elicitation were set as follows: the number of repetitions, any; the maximum number of motifs, 50; and the optimum width of each motif, between 6 and 300 residues.

## Plant materials and treatments

The strawberry (*Fragaria vesca* 'Ruegen') plants were cultivated at  $22\pm 1^\circ\text{C}$  in a 13/11 h light/dark photoperiod in the Tissue Culture Center at Beijing University of Agriculture. To investigate *FvMRLK* expression in different strawberry tissues, the roots, stems, leaves, and fruits were independently sampled and analyzed using qRT-PCR. Root samples were taken from white, new roots, stem samples were taken from new creeping stems, leaf samples were the leaves 15 days old, fruit samples were taken from medium green fruits. To study the expression of *FvMRLKs* at different developmental stages, strawberry fruits were divided into five developmental stages, i.e., SG: small green stage; MG: medium green stage; LG: large green stage; TN: turn stage; and FR: full red stage, and were independently sampled. At each developmental stage, ten representative fruits were sampled, snap-frozen in liquid nitrogen, and kept at  $-80^\circ\text{C}$  for subsequent analysis. The expression of the *FvMRLK* genes in the five fruit developmental stages was analyzed using qRT-PCR. MG fruits were selected to study some of the high-expression genes of fruit in response to various environmental cues and internal signals, including heat treatment ( $40^\circ\text{C}$ , 4 h), cold treatment ( $4^\circ\text{C}$ , 48 h), dehydration treatment ( $25^\circ\text{C}$ , 8 h), ABA treatment ( $25^\circ\text{C}$ ,  $100\mu\text{M}$ , 6 h), IAA treatment ( $25^\circ\text{C}$ ,  $500\mu\text{M}$ , 6 h), and sucrose treatment ( $25^\circ\text{C}$ ,  $100\text{mM}$ , 6 h). The fruits were cut in half with one-half used for the treatment and the other half as a control. The controls were maintained at  $25^\circ\text{C}$  and 100% relative humidity. Three biological replicates were used in all experiments. The expression data in the heat-map were calculated as  $\log_2$  fold change in treated vs. untreated samples.

## RNA preparation and quantitative RT-PCR analysis

Total RNA was isolated using a Plant RNA Kit (Omega) according to the manufacturer's instructions. Quantitative RT-PCR was conducted on a LightCycler 96 Real Time PCR System (Roche Diagnostics GmbH, Mannheim City, Germany) using SYBR-Green (Takara, Dalian, China). The oligonucleotide primers were designed based on the predicted coding region using Beacon designer software and are listed in S1 Table. Primers were checked using the BLAST tool of NCBI and the dissociation curve was analyzed after the PCR reaction for primer specificity. In addition, the specificity of PCR products was verified by cloning the relative amplicons in the pMD19-T vector (Takara), sequencing, and aligning them onto the reference genome. Each reaction was carried out in a volume of  $20\mu\text{L}$ , which contained  $10\mu\text{L}$  SYBR-Green master mix,  $8.6\mu\text{L}$  ddH<sub>2</sub>O,  $1\mu\text{L}$  diluted template ( $1\mu\text{L}$  of the generated first-strand cDNA was diluted in  $9\mu\text{L}$  ddH<sub>2</sub>O), and  $0.2\mu\text{L}$  of each gene-specific primer. The following program conditions were used:  $95^\circ\text{C}$  for 600 s (pre-denaturation) followed by 40 cycles at  $95^\circ\text{C}$  for 20 s (denaturation),  $53^\circ\text{C}$  for 20 s (primer annealing), and  $72^\circ\text{C}$  for 20 s (extension and data acquisition). Three technical replicates were performed for each biological replicate. The *actin-7* gene (LOC101313051), which maintained almost constant expression levels under all experimental conditions, was used as an internal control.

## Results

### Identification and annotation of *MRLK* genes in the strawberry genome

To identify *FvMRLK* subfamily genes, we first obtained the HMM profile of the malectin domain (pfam11721) and malectin-like domain (pfam12819) from the pfam protein families database. Using the malectin or malectin-like domain information, we searched three databases, the National Centre for Biotechnology Information, the Strawberry Genome Browser, and PLAZA. We identified a total of 100 candidate *FvMRLK* genes in the *Fragaria vesca* genome. The 100 *FvMRLK* candidates were further examined by searching the malectin or malectin-like domain in the NCBI database and 62 members were confirmed to be *FvMRLKs*, which were named *FvMRLK1* to *FvMRLK62* based on their chromosome location. The characteristics of the *FvMRLK* proteins are listed in Table 1 and include the deduced protein length, molecular weight, isoelectric point (PI), aliphatic index, and the grand average of hydropathicity. The deduced length of the *FvMRLK* proteins ranged from 132 (*FvMRLK16*) to 1,955 (*FvMRLK51*) amino acid residues, whereas the PI ranged from 4.54 (*FvMRLK33*) to 8.88 (*FvMRLK55*). Thirty-one *FvMRLK* members contained a signal peptide (S2 Table).

### Chromosomal distribution and exon-intron organization of the *FvMRLK* genes

The *FvMRLK* genes were mapped across the chromosomes of the strawberry genome. As shown in Fig 1, 60 of the 62 *FvMRLK* genes were distributed on chromosomes 1 through 7. Chromosome 3 (22 genes) contained the largest number of *FvMRLK* genes and chromosome 5 (2 genes) contained the smallest number of *FvMRLK* genes. We were unable to map two *FvMRLKs* (*FvMRLK61* and *FvMRLK62*) to any of the chromosomes. Based on the definition of a gene cluster by Holub [40], the *FvMRLKs* were placed into ten clusters. Among the ten clusters, five were found on chromosome 3 and two on chromosomes 6, whereas only one cluster was located on chromosomes 1, 4, and 7. Tandem and segmental duplications have been suggested as two main causes for gene family expansion in plants [41]. Five clusters of *FvMRLKs* with tandem duplications were found to be located on chromosome 3. To characterize the evolution of the *FvMRLK* family genes in strawberry, we analyzed the exon-intron structures of all *FvMRLKs*. We found that the intron numbers varied greatly (from 0 to 47) (Fig 2) amongst members of this gene family. For example, while *FvMRLK5* had no introns, *FvMRLK62* had 47. Interestingly, it appeared that the *FvMRLKs* within the same group generally had a similar exon-intron structure.

### Phylogenetic analysis, classification, and motifs of the strawberry *MRLK* gene family

To determine the phylogenetic relationship between strawberry and *Arabidopsis MRLKs*, we constructed an unrooted phylogenetic tree based on alignments of the full-length protein sequences. The phylogenetic analyses showed that *FvMRLKs* could be classified into six large groups. As shown in Fig 3, group I, II, III, IV, V, and VI contained 10, 12, 7, 14, 7, and 4 members, respectively. A major difference in the protein structure among the different groups was the number of malectin and malectin-like domains. For example, while most of the members of group I contained two malectin domains and one malectin-like domain, most of the members of group II contained one malectin domain and one malectin-like domain. Furthermore, while most of the members of group III and V contained one malectin-like domain, most of the members of group IV and VI contained only one malectin domain. Using the Multiple Expectation Maximization for Motif Elicitation online tool (<http://meme-suite.org/>), we

**Table 1. Strawberry MRLK genes identified in the *Fragaria vesca*.**

| Proposed name   | Gene      | Locus name   | Chr | ORF (aa) | MW(kDa)  | pI   | Ai     | GRAVY  | strand | Group |
|-----------------|-----------|--------------|-----|----------|----------|------|--------|--------|--------|-------|
| <i>FvMRLK 1</i> | gene26561 | XP_004288865 | 1   | 1016     | 114893.9 | 6.72 | 75.53  | -0.624 | +      | VI    |
| <i>FvMRLK 2</i> | gene11357 | XP_004287503 | 1   | 890      | 98998.4  | 5.62 | 89.15  | -0.188 | -      | III   |
| <i>FvMRLK 3</i> | gene28050 | XP_011462047 | 1   | 639      | 70994.6  | 5.98 | 93.79  | -0.179 | -      | IV    |
| <i>FvMRLK 4</i> | gene24016 | XP_011463697 | 1   | 858      | 95229.8  | 5.83 | 86.93  | -0.164 | +      | II    |
| <i>FvMRLK 5</i> | gene24017 | XP_004289187 | 1   | 814      | 90517.6  | 6.19 | 88.5   | -0.153 | +      | II    |
| <i>FvMRLK 6</i> | gene16334 | XP_011465668 | 1   | 1187     | 128931.7 | 7.77 | 79.94  | -0.2   | +      | IV    |
| <i>FvMRLK 7</i> | gene05569 | XP_004288317 | 1   | 783      | 87567.3  | 4.76 | 99.03  | -0.122 | +      | III   |
| <i>FvMRLK 8</i> | gene20704 | XP_011468416 | 1   | 1086     | 123288.5 | 6.43 | 80.22  | -0.723 | -      | VI    |
| <i>FvMRLK 9</i> | gene21850 | XP_004289649 | 2   | 1461     | 161379   | 7.16 | 77.67  | -0.293 | +      | II    |
| <i>FvMRLK10</i> | gene17333 | XP_011458098 | 2   | 844      | 92261.1  | 5.3  | 96.34  | 0.012  | +      | II    |
| <i>FvMRLK11</i> | gene17626 | XP_011458187 | 2   | 868      | 96529.3  | 6.1  | 100.48 | -0.079 | -      | III   |
| <i>FvMRLK12</i> | gene11624 | XP_011459850 | 2   | 848      | 93736.8  | 5.95 | 91.84  | -0.241 | +      | VI    |
| <i>FvMRLK13</i> | gene19789 | XP_004293373 | 3   | 971      | 108344.2 | 8.4  | 89.17  | -0.366 | +      | VI    |
| <i>FvMRLK14</i> | gene34059 | XP_011461991 | 3   | 135      | 15483.9  | 9.65 | 96.74  | -0.248 | +      | IV    |
| <i>FvMRLK15</i> | gene24842 | XP_011461995 | 3   | 1789     | 197989.3 | 7.59 | 95.41  | -0.015 | +      | IV    |
| <i>FvMRLK16</i> | gene32988 | XP_011460577 | 3   | 132      | 14904.1  | 7.82 | 97.42  | -0.071 | +      | V     |
| <i>FvMRLK17</i> | gene29734 | XP_011460577 | 3   | 681      | 74929.4  | 6.57 | 92.35  | -0.072 | +      | V     |
| <i>FvMRLK18</i> | gene28878 | XP_011460644 | 3   | 916      | 102254.3 | 6.04 | 79.6   | -0.343 | -      | II    |
| <i>FvMRLK19</i> | gene30033 | XP_011462047 | 3   | 1007     | 110147.1 | 6.6  | 88.68  | -0.169 | +      | IV    |
| <i>FvMRLK20</i> | gene27319 | XP_011460815 | 3   | 1014     | 111185.8 | 5.62 | 94.62  | -0.101 | -      | IV    |
| <i>FvMRLK21</i> | gene27321 | XP_011460818 | 3   | 1011     | 110937.6 | 5.41 | 92.2   | -0.091 | +      | IV    |
| <i>FvMRLK22</i> | gene27326 | XP_011460817 | 3   | 966      | 106406.5 | 6.2  | 91.15  | -0.162 | +      | IV    |
| <i>FvMRLK23</i> | gene27328 | XP_004295664 | 3   | 1007     | 110243.5 | 5.65 | 94.14  | -0.062 | +      | IV    |
| <i>FvMRLK24</i> | gene27329 | XP_011460821 | 3   | 931      | 102026.6 | 5.24 | 90.09  | -0.144 | +      | IV    |
| <i>FvMRLK25</i> | gene27330 | XP_011460823 | 3   | 759      | 83739.9  | 5.97 | 87.76  | -0.236 | +      | IV    |
| <i>FvMRLK26</i> | gene25018 | XP_011461160 | 3   | 1145     | 125496.7 | 6.12 | 91.15  | -0.092 | -      | II    |
| <i>FvMRLK27</i> | gene25031 | XP_011463354 | 3   | 239      | 27018.6  | 4.66 | 84.9   | -0.091 | +      | V     |
| <i>FvMRLK28</i> | gene14004 | XP_004294625 | 3   | 1169     | 125860.1 | 5.37 | 71.2   | -0.357 | -      | V     |
| <i>FvMRLK29</i> | gene14005 | XP_011462143 | 3   | 577      | 62611.1  | 4.75 | 74.33  | -0.353 | -      | V     |
| <i>FvMRLK30</i> | gene14010 | XP_004294627 | 3   | 832      | 91480.3  | 5.54 | 83.73  | -0.116 | +      | II    |
| <i>FvMRLK31</i> | gene28048 | XP_011462168 | 3   | 493      | 54445.5  | 4.84 | 93.33  | -0.145 | -      | IV    |
| <i>FvMRLK32</i> | gene28580 | XP_004296071 | 3   | 484      | 53260.3  | 5.25 | 85.76  | -0.217 | +      | V     |
| <i>FvMRLK33</i> | gene05121 | XP_004296244 | 3   | 468      | 52082.6  | 4.54 | 73.12  | -0.453 | +      | I     |
| <i>FvMRLK34</i> | gene05124 | XP_004296245 | 3   | 860      | 94587.5  | 6.28 | 81.28  | -0.239 | +      | I     |
| <i>FvMRLK35</i> | gene22909 | XP_011463352 | 4   | 756      | 85062.9  | 5.26 | 86.89  | -0.321 | +      | III   |
| <i>FvMRLK36</i> | gene28915 | XP_011460364 | 4   | 731      | 81731.3  | 6.06 | 100.01 | 0.001  | -      | IV    |
| <i>FvMRLK37</i> | gene05892 | XP_004298162 | 4   | 576      | 62901.4  | 5.2  | 91.37  | -0.097 | -      | V     |
| <i>FvMRLK38</i> | gene03872 | XP_004298306 | 4   | 602      | 66979.6  | 5.29 | 86.45  | -0.189 | -      | V     |
| <i>FvMRLK39</i> | gene04553 | XP_004298352 | 4   | 791      | 88436.4  | 7.32 | 83.64  | -0.296 | +      | I     |
| <i>FvMRLK40</i> | gene23070 | XP_004298555 | 4   | 375      | 42757    | 5.02 | 84.19  | -0.36  | -      | III   |
| <i>FvMRLK41</i> | gene22902 | XP_004297625 | 4   | 835      | 92486    | 5.95 | 86.66  | -0.147 | -      | III   |
| <i>FvMRLK42</i> | gene22907 | XP_011463354 | 4   | 1609     | 181729   | 5.63 | 86.52  | -0.329 | +      | III   |
| <i>FvMRLK43</i> | gene22908 | XP_011463354 | 4   | 791      | 89658.1  | 5.97 | 89.67  | -0.273 | +      | III   |
| <i>FvMRLK44</i> | gene26060 | XP_004301135 | 5   | 1434     | 161363.1 | 6.56 | 82.37  | -0.346 | +      | II    |
| <i>FvMRLK45</i> | gene09312 | XP_011465700 | 5   | 489      | 53813.9  | 5.87 | 86.97  | -0.064 | +      | V     |
| <i>FvMRLK46</i> | gene16583 | XP_004304753 | 6   | 878      | 96629.5  | 5.74 | 76.99  | -0.369 | +      | I     |
| <i>FvMRLK47</i> | gene13568 | XP_004302537 | 6   | 883      | 96718.3  | 6.03 | 75.54  | -0.236 | -      | I     |

(Continued)

Table 1. (Continued)

| Proposed name   | Gene      | Locus name   | Chr | ORF (aa) | MW(kDa)  | pI   | Ai    | GRAVY  | strand | Group |
|-----------------|-----------|--------------|-----|----------|----------|------|-------|--------|--------|-------|
| <i>FvMRLK48</i> | gene18098 | XP_011466646 | 6   | 969      | 107689.9 | 5.7  | 88.14 | -0.31  | +      | III   |
| <i>FvMRLK49</i> | gene25622 | XP_004305253 | 6   | 762      | 85854.7  | 5.17 | 83.39 | -0.358 | +      | III   |
| <i>FvMRLK50</i> | gene04244 | XP_004306057 | 6   | 885      | 98830.2  | 6.5  | 78.73 | -0.287 | +      | I     |
| <i>FvMRLK51</i> | gene04245 | XP_004306058 | 6   | 1955     | 216885.6 | 7.02 | 79.46 | -0.254 | +      | I     |
| <i>FvMRLK52</i> | gene04246 | XP_004306059 | 6   | 841      | 93694    | 6.31 | 82.87 | -0.239 | +      | I     |
| <i>FvMRLK53</i> | gene04247 | XP_011467877 | 6   | 833      | 92932.8  | 6.65 | 81.46 | -0.26  | +      | I     |
| <i>FvMRLK54</i> | gene04250 | XP_004306062 | 6   | 827      | 92049.3  | 5.76 | 85.83 | -0.198 | -      | I     |
| <i>FvMRLK55</i> | gene19246 | XP_011468989 | 7   | 458      | 50587.8  | 8.88 | 92.93 | 0.017  | +      | II    |
| <i>FvMRLK56</i> | gene23363 | XP_004307450 | 7   | 814      | 90488.8  | 7.22 | 92.16 | -0.044 | -      | II    |
| <i>FvMRLK57</i> | gene23366 | XP_011470602 | 7   | 568      | 63963.8  | 7.52 | 80.44 | -0.278 | -      | V     |
| <i>FvMRLK58</i> | gene26704 | XP_004308888 | 7   | 848      | 94034.1  | 6.38 | 91.8  | -0.081 | -      | II    |
| <i>FvMRLK59</i> | gene12571 | XP_004307857 | 7   | 592      | 64822    | 4.57 | 87.75 | -0.091 | -      | V     |
| <i>FvMRLK60</i> | gene13200 | XP_011470689 | 7   | 829      | 91709.2  | 6.63 | 88.85 | -0.153 | -      | II    |
| <i>FvMRLK61</i> | gene06940 | XP_011457436 | Un  | 931      | 104255.7 | 5.87 | 89.52 | -0.229 | -      | III   |
| <i>FvMRLK62</i> | gene23790 | XP_004309619 | Un  | 1664     | 185177.7 | 6.25 | 95.77 | -0.12  | -      | IV    |

Abbreviations: Ai, aliphatic index; Chr, chromosome numbers; GRAVY, grand average of hydrophaticity; MW, molecular weight; ORF, open reading frame; pI, isoelectric point; UN, unknown chromosome.

doi:10.1371/journal.pone.0163647.t001

identified 20 conserved motifs in the FvMRLK subfamily (Fig 4 and Table 2). Motif 6, 8, 9, 10, 14, 15, 16, 17, 18, 19, and 20 represented pivotal motifs of the malectin domains in strawberry and these conserved motifs were distributed widely amongst all FvMRLK groups. As shown in Fig 4, the FvMRLKs within the same group were found to share a similar motif composition. For example, whereas motif 19 was only found in group III, motif 10,15, and 20 were found mainly in group I and II.

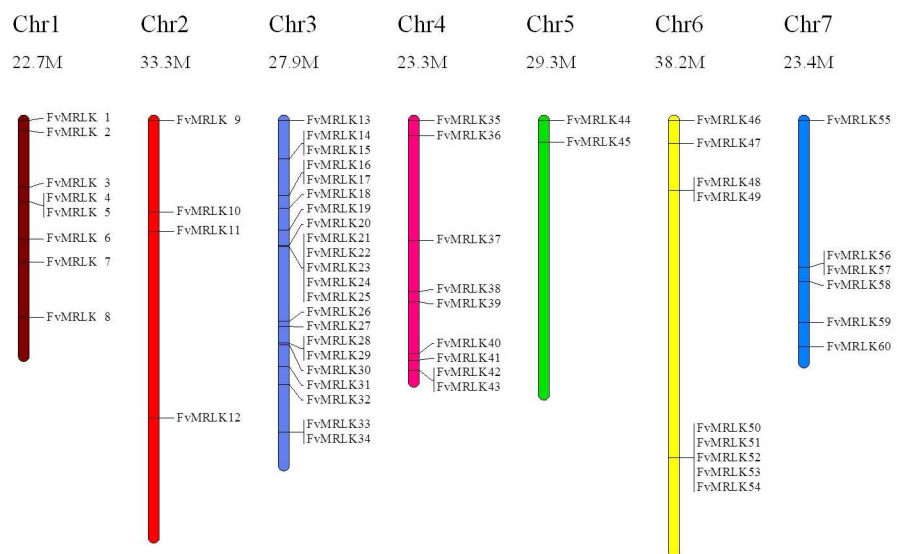

Fig 1. Chromosomal distribution of the FvMRLK genes. Chromosome numbers are provided at the top of each chromosome together with the approximate size. The FvMRLKs were named FvMRLK01 to FvMRLK62 based on their order on the chromosomes.

doi:10.1371/journal.pone.0163647.g001

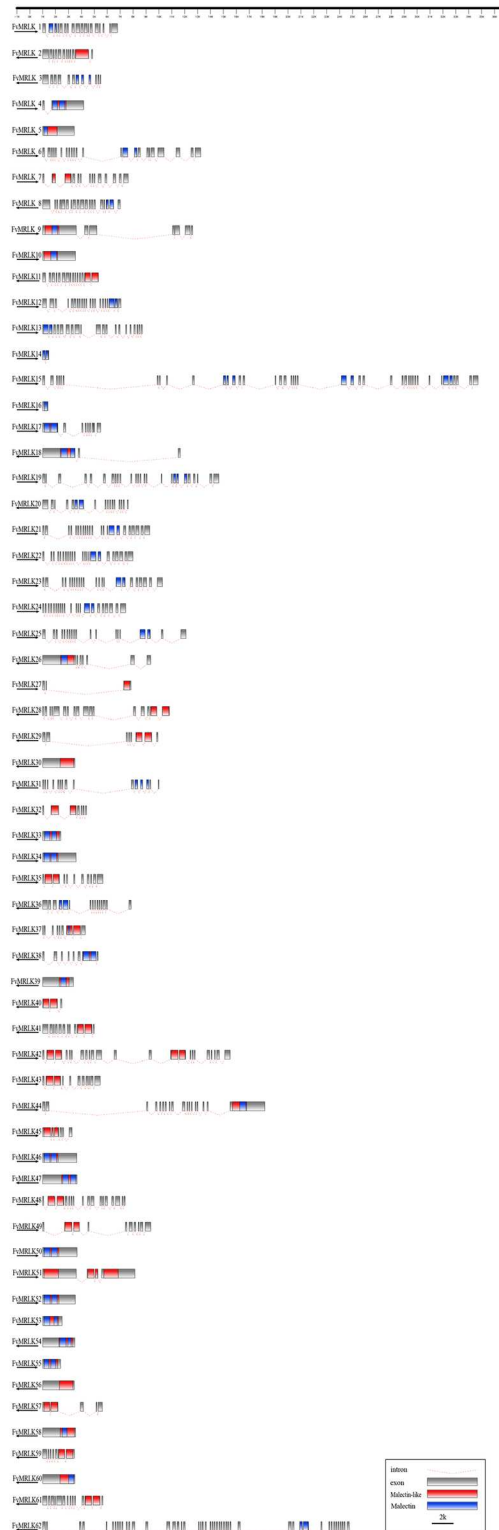

**Fig 2. Structures and exon–intron composition of the FvMRLK genes.** Names of genes are indicated on the left. Exons, represented by gray boxes, are drawn to scale. Dashed lines connecting two exons represent an intron. Malectin and malectin-like domains in the FvMRLK proteins are marked in blue and red, respectively.

doi:10.1371/journal.pone.0163647.g002



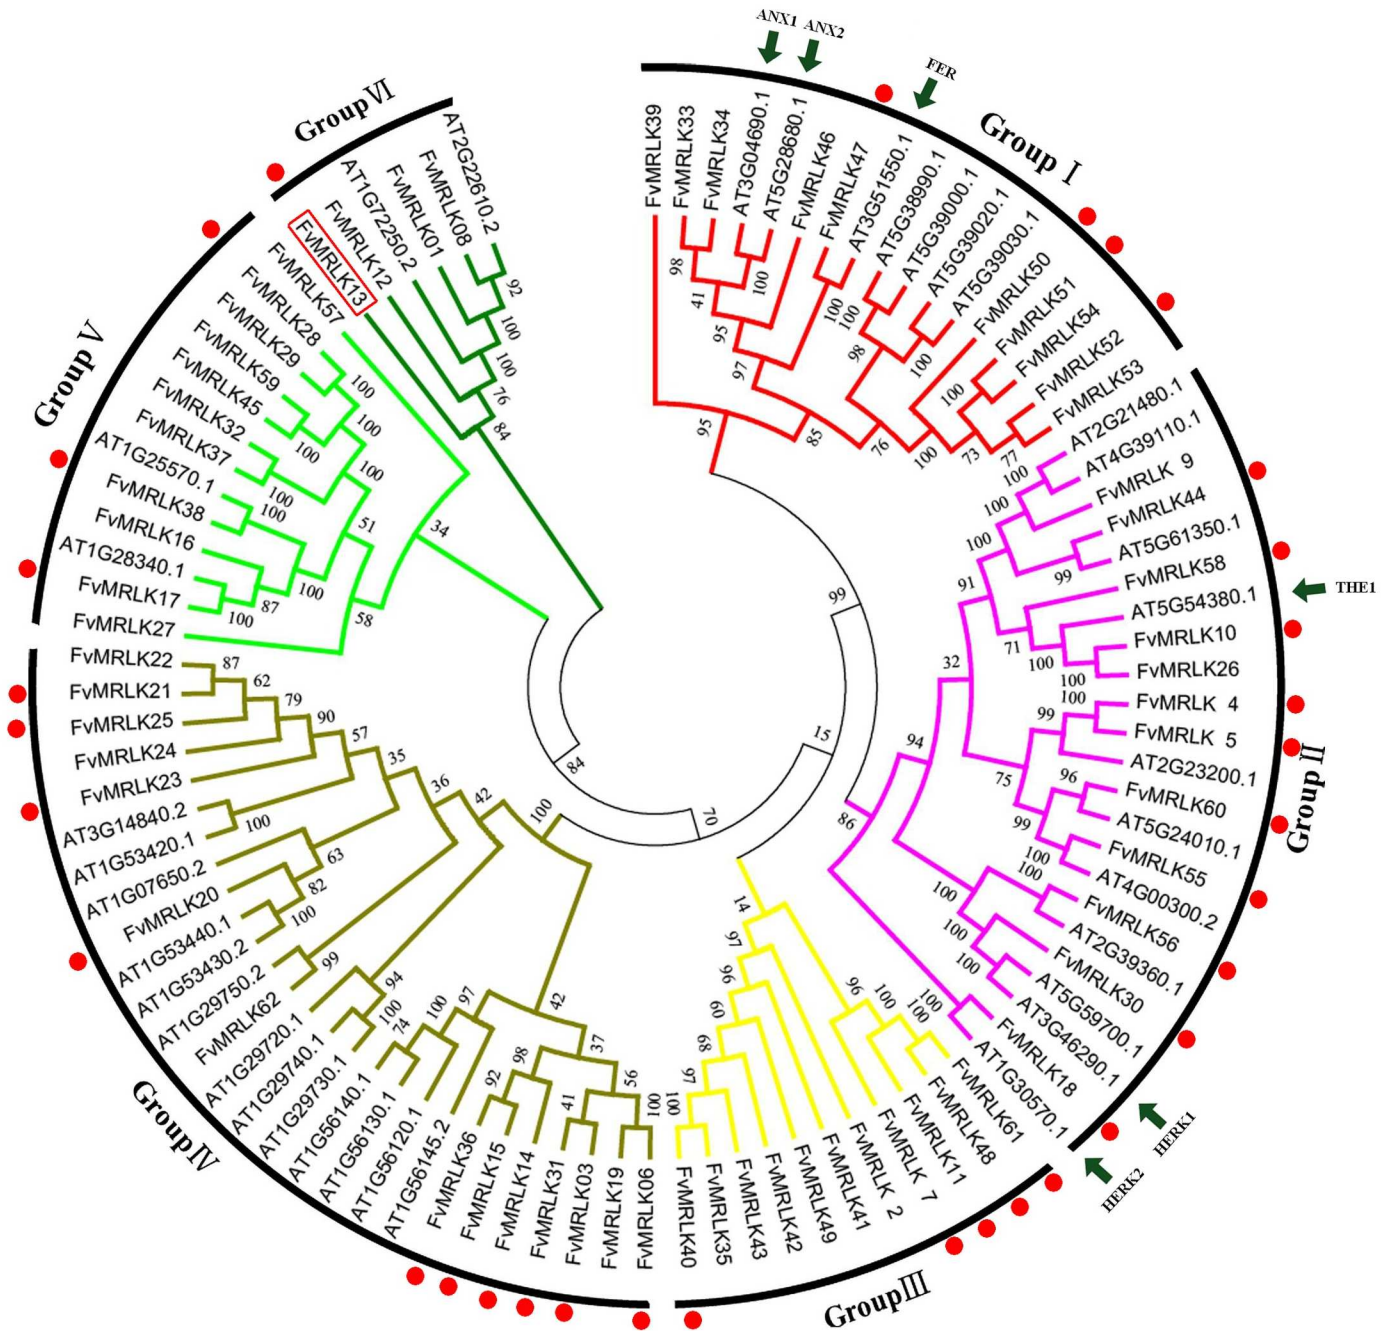

**Fig 3. Phylogenetic tree of the MRLKs based on an alignment of strawberry and Arabidopsis protein sequences.** The un-rooted phylogenetic tree was constructed with ClustalX 2.1 using the neighbour-joining method implemented in MEGA 5.0. Reliability of the predicted tree was tested using bootstrapping with 1000 replicates. Branch lines with different colors represent different MRLK groups. The functionally-elucidated homologs from Arabidopsis are labeled by arrows and the FvMRLKs expressed in fruits are labeled by red-spots.

doi:10.1371/journal.pone.0163647.g003

### FvMRLK expression profiles in strawberry

The expression profiles of the *FvMRLKs* varied in different organs or tissues of strawberry. As shown in Fig 5, high levels of *FvMRLK* gene expression were found in roots. The transcript levels of more than 80% of the genes were much higher in roots than in other organs, suggesting

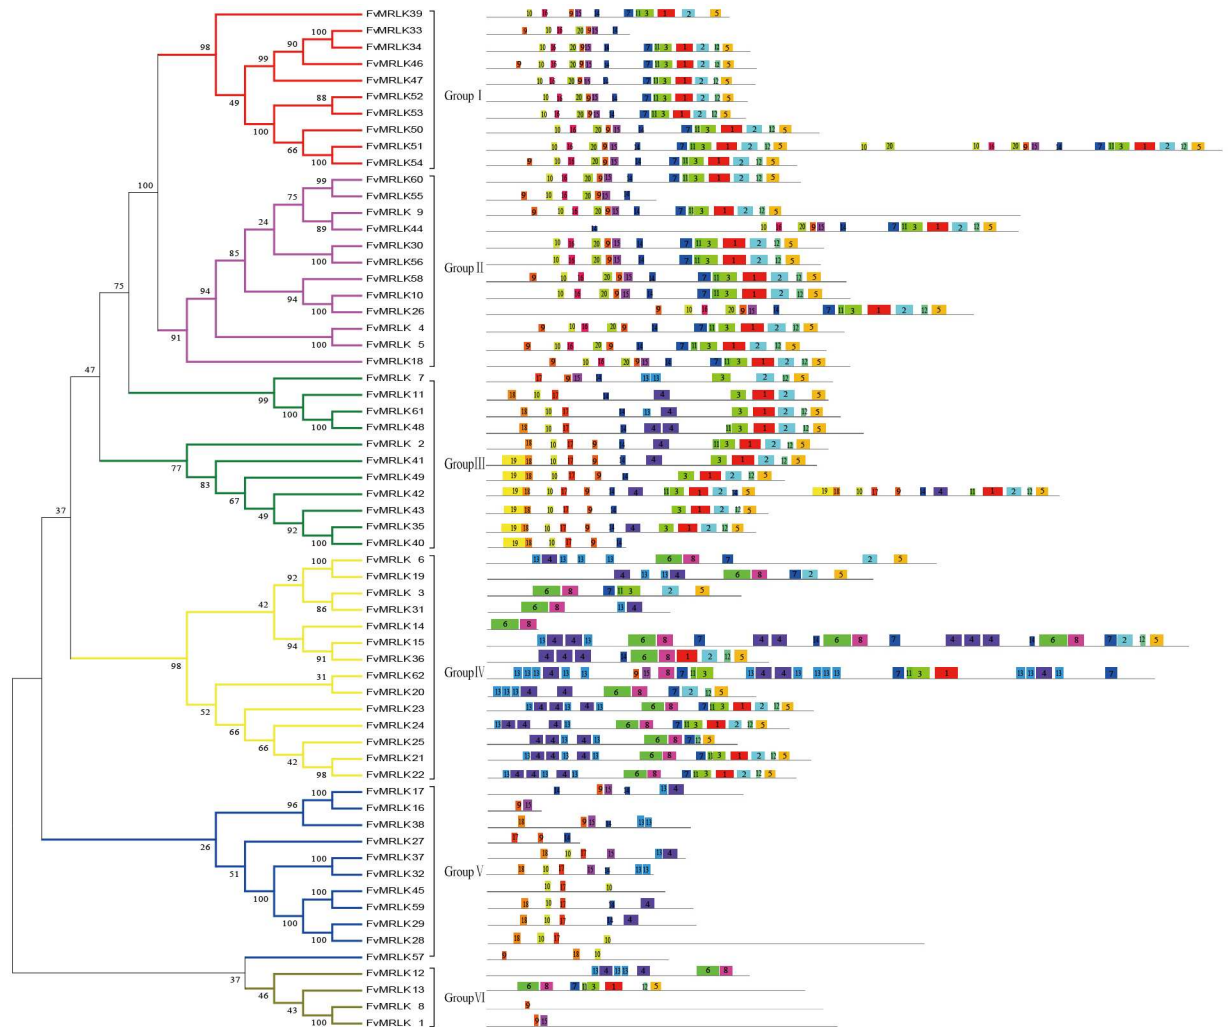

**Fig 4. Phylogenetic tree of deduced FvMRLK proteins associated with the motif compositions in the amino-acid sequences.** The phylogenetic trees were constructed using the neighbour-joining method implemented in MEGA 5.0. Reliability of the predicted tree was tested using bootstrapping with 1000 replicates. Numbers at the nodes indicate how often the group to the right appeared among bootstrap replicates. The motif composition related to each FvMRLK protein is displayed on the right-hand side. The motifs, numbered 1–20, are displayed in different colored boxes. The sequence information for each motif is provided in [Table 2](#).

doi:10.1371/journal.pone.0163647.g004

that *FvMRLKs* is a regulator of root growth and development. Although the expression levels of most of the genes were lower in fruits than in roots, 33 members genes were found to be expressed in fruits ([Fig 6a](#)). More than 60% of these 33 genes were expressed at high levels only in the early stages of fruit development and exhibited dramatic decreases in expression as fruit development progressed ([Fig 6b](#)). While the expression of *FvMRLK4*, 5, 7, 14, 21, 23, 40 and 60 declined sharply in the earliest developmental stage (SG) [42], the expression of *FvMRLK6*, 11,17,18,52 and 58 dropped dramatically at the MG stage and the expression of *FvMRLK10*, 15,28,27,47,56 and 61 dropped dramatically at the LG stage. This result suggests that many *FvMRLKs* play important roles in the regulation of strawberry fruit growth and development and that there may be synergistic effects between different *FvMRLKs* that participate in these processes.

**Table 2. Analysis and distribution of conserved motifs in FvMRLKs.**

| Motif | Sites | E-value   | Width | Best possible match                                                                                                                                          |
|-------|-------|-----------|-------|--------------------------------------------------------------------------------------------------------------------------------------------------------------|
| 1     | 38    | 5.1E-1440 | 55    | L[ST]W[KE]QRL[EQ][CA][IV][GD]AA[RK]GL[HE]YLHTG[AC][KA]PTI[IV]HRD[VI]K[ST]TNILLDE[NK][LFW]V[AP]K[VI][SA]DFGLSK                                                |
| 2     | 42    | 4.8E-1120 | 41    | TAV[KA]G[ST]FGYL[DA]PEY[YFA][RM]R[QG]QLT[ED]KSDVYSFG[VI]VL[LF]E[VI][LVI][CS][GA]RP                                                                           |
| 3     | 39    | 7.9E-947  | 41    | HEFQ[TN]EIE[ML]LS[KR][LI][RH]HR[HN]LVSLIGYCD[ED][GK][GN][EQ][ML]ILVY[ED]YM[AE]NG                                                                             |
| 4     | 50    | 2.1E-677  | 41    | [NS][LI][EQ]T[LI]DLS[NS]NN[LF][TS]GS[LI]PE[SF][L][GA][NK][LI][TP]TLKxL[ND][LI]SFNS[LF][ST]Gx[ILV]P                                                           |
| 5     | 44    | 1.3E-560  | 34    | KF[IGV]E[VIT]A[LE][KL]C[LTV]x[ED]S[GAP][VA][DE]RP[ST]M[SG]DV[LV][WS][NME]LE[GY]ALQ[LI][QE]                                                                   |
| 6     | 17    | 1.9E-560  | 70    | [ILS]SL[TR]YY[GA][FL][CG]L[AEG]NGNYTV[KN]LHFAEI[MV][FIL][RLT][DN][ND][RT][TS]Y[KSY][SG][LV] GRR[IV]FD[VI]YIQ[GD]K[LR]VLKDF[ND][AR]KEAGGx[GD]K[EA][VI][IV]KEF |
| 7     | 37    | 8.0E-572  | 29    | F[ST][LF]A[EQ][IL][KQ]AATNNFD[EP]A[NL][KV][IL]G[EV]GGFG[PNK]VYK                                                                                              |
| 8     | 18    | 1.0E-345  | 41    | V[TSN][ENV][NS]TLEI[RH][FL][FY]WAGKGT[TC][CGN][IV]P[AR]RGTYG[PS]LISAIS[VA]T[PS]DF[KE]P                                                                       |
| 9     | 50    | 2.60E-211 | 15    | [PS]N[FG]xYL[VI]RLHF[CA][ED][IF][EV]                                                                                                                         |
| 10    | 44    | 1.30E-188 | 16    | K[SD][GSA][YFV][AP]F[IV][NS][AG][IL]E[VL][VR][SP][LM]P                                                                                                       |
| 11    | 33    | 2.40E-165 | 15    | TK[VI]A[VI]KR[LG][NS]PxS[EK]QG                                                                                                                               |
| 12    | 38    | 4.60E-130 | 15    | [CL][QH][EK]KGx[LI][ED][QE][IL][VI]DPRL                                                                                                                      |
| 13    | 50    | 3.80E-186 | 21    | TxLQx[LI]DLTGNYL[ST]G[PT]IPSE[IL]                                                                                                                            |
| 14    | 47    | 5.70E-138 | 15    | L[DP][AP][IL]LN[GA]LEI[LYF]K[IL][SN][ND]                                                                                                                     |
| 15    | 29    | 1.10E-103 | 21    | L[GN]Q[RL]VF[DN][VI][YF][IV]N[NG]QT[AV]ESD[AL]D[VLI]                                                                                                         |
| 16    | 23    | 3.80E-102 | 15    | AL[EQ][TM][MV]YR[LV]N[VM]GG[PS]L[IV]                                                                                                                         |
| 17    | 19    | 1.70E-97  | 15    | [IY]RYPDD[PV][YFH]DR[IF]W[DY][PS][FY]                                                                                                                        |
| 18    | 18    | 1.40E-96  | 20    | [KS]GT[KR]YL[IV]RA[ST]F[YV]YGNVDG[KQ][NGS]                                                                                                                   |
| 19    | 7     | 7.30E-144 | 57    | SYTEQTTGINYISD[AT]GF[IV]DTGESKLV[PR][EY][YV][RK]D[NT]YQQPYW[SG][LV]RSFPEG[TI]RNCY[KR]INVT                                                                    |
| 20    | 23    | 9.50E-120 | 23    | [YE][ISV]APK[EW]VYKT[AG]RSMGDN[KN]TINK[NS]                                                                                                                   |

doi:10.1371/journal.pone.0163647.t002

### Expression of *FvMRLKs* in response to environmental and internal cues

Strawberry fruit development and ripening are regulated by environmental cues, such as temperature and drought stress, and internal signals, such as auxin (IAA), abscisic acid (ABA), and sucrose. To establish whether *FvMRLKs* are indeed involved in strawberry fruit development and ripening, we examined the expression of selected *FvMRLKs* in response to IAA, ABA, and sucrose treatment as well as to temperature and dehydration stresses. As shown in Fig 7a, the expression of nearly all of the *FvMRLK* genes examined were sensitive to low temperature. The gene expression of some *FvMRLKs* increased more than 25-fold in response to low temperature treatment. Some *FvMRLKs* were also sensitive to the dehydration treatment, but the dehydration-induced changes in gene expression were generally smaller than those following low temperature treatment. As a negative regulator, IAA plays critical roles in the regulation of strawberry fruit development and ripening, whereas both ABA and sucrose have been demonstrated to be positive regulators of strawberry fruit ripening [43]. Consistent with this, IAA treatment was found to result in a dramatic increase in gene expression for most of the

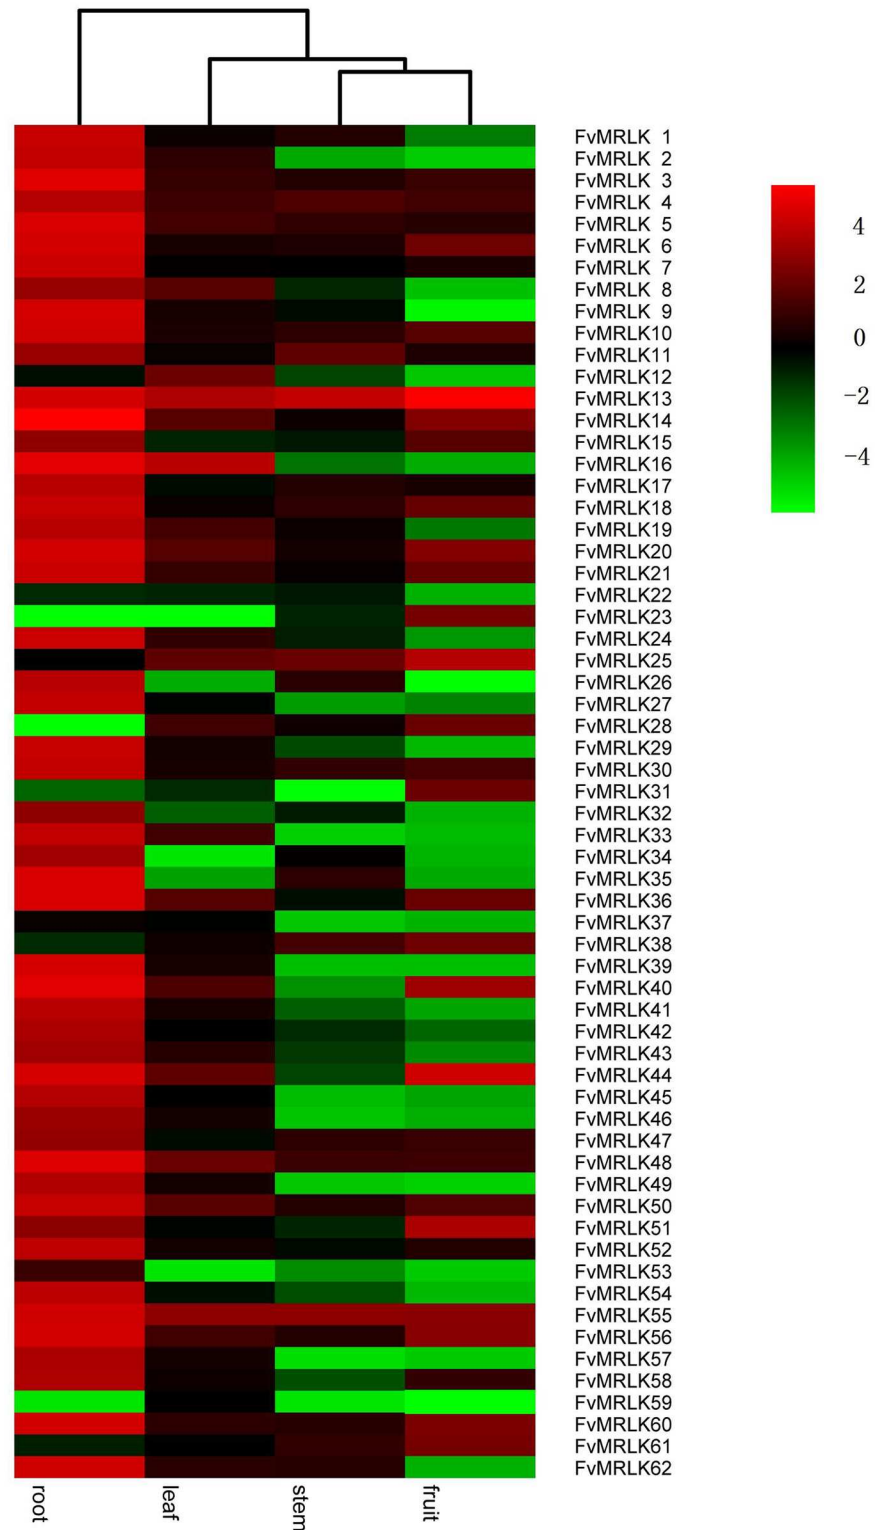

**Fig 5. Expression profiles of the strawberry *FvMRLK* genes in different tissues.** The heat map was generated based on the mean values of the qRT-PCR data from different samples. Red and green represent higher and lower expression, respectively.

doi:10.1371/journal.pone.0163647.g005

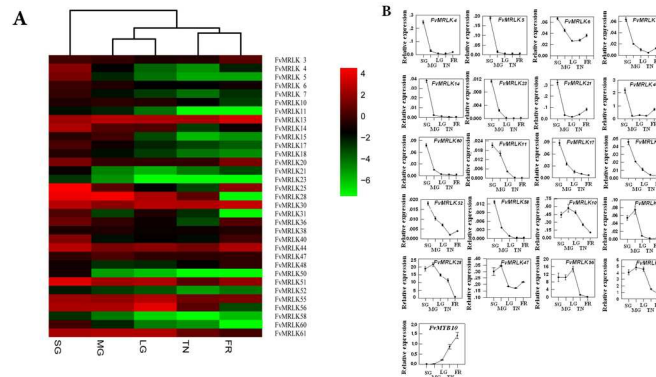

**Fig 6. Changes in the expression profiles of *FvMRLK* genes during strawberry fruit growth and development.** (a) Heat map showing the expression profiles of the *FvMRLK* genes. The heat map was generated based on the mean values of the qRT-PCR data of the different samples. Red and green colors represent higher or lower expression. (b) Expression of the *FvMRLK*s decreased during strawberry fruit growth and development. The data are the mean of 3 replicates  $\pm$ SE.

doi:10.1371/journal.pone.0163647.g006

*FvMRLK* genes examined. By contrast, ABA and sucrose treatments resulted in a decrease in expression of some of the *FvMRLK* genes examined (Fig 7b). Collectively, these results suggest that *FvMRLK*s play important roles, and moreover, most of them function as negative regulators in the regulation of strawberry fruit development and ripening.

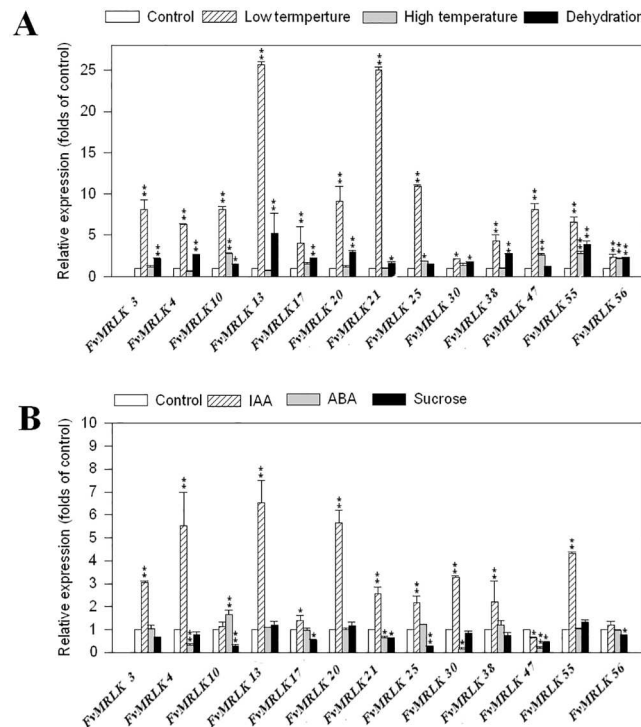

**Fig 7. Expression of the *FvMRLK*s in response to environmental cues and internal signals that play critical roles in the regulation of strawberry fruit development and ripening.** (a) Effect of environmental cues on the expression of *FvMRLK*s; (b) effect of internal signals on the expression of *FvMRLK*s. Gene expression was determined by qRT-PCR. The data are the mean of 3 replicates  $\pm$ SE.

doi:10.1371/journal.pone.0163647.g007

## Discussion

### The malectin and malectin-like domain containing RLKs family in relation to the *CrRLK1L* gene family

In *Arabidopsis*, CrRLK1Ls are a unique subfamily of RLKs comprised of 17 members. Given that CrRLK1Ls were found to contain malectin or malectin-like domains in their extracellular sequence [31], the CrRLK1Ls family has been commonly thought to be the same in terminology with the family of proteins containing malectin and malectin-like domain. In the present study, to compare FvMRLKs with the MRLKs in *Arabidopsis*, we searched the *Arabidopsis* genome for the identification of the proteins containing the malectin and malectin-like domain. The results indicated that the *Arabidopsis* genome harbors 35 proteins containing malectin or malectin-like domains (S3 Table), which is greater than the 17 *Arabidopsis CrRLK1L* genes. Since the number of the malectin and malectin-like domain-containing proteins is much larger than that of the CrRLK1L family, it is clearly not reasonable to regard the CrRLK1L family as the family of proteins containing malectin and malectin-like domain. Because of this, in the present study, we categorized the malectin and malectin-like domain containing proteins into a unique family, and thus named as the MRLK gene family.

### Phylogenetic characteristics of *FvMRLKs*

Strawberry genome size varies by species. With 34,809 genes resulted from gene prediction modeling, the genome of diploid strawberry, *F. vesca*, is about twice size of the *Arabidopsis* genome (240 Mb for *F. vesca* versus 125 Mb for *Arabidopsis*) [44]. In the present study, we identified 62 *FvMRLKs* in the strawberry genome database and 35 *MRLKs* members in the *Arabidopsis* genome. Based on a phylogenetic tree generated by an alignment of the MRLK protein sequences from strawberry and *Arabidopsis*, we classified the 62 *FvMRLKs* into six major groups (Fig 3). Members within the same group shared a similar gene structure, length, and amino acid motif composition, indicating their close evolutionary relationship. *FvMRLK21*, *22*, *23*, *24*, and *25*, which were similar in motif type and the distribution and contained tandem duplications, were clustered on chromosome 3. The change in motif composition from group I to group VI may reflect the evolutionary process of the *FvMRLK* gene family. Tandem duplications and segmental/whole-genome duplications represent two of the major mechanisms for the expansion of the *RLK* gene family in plants [25]. The existence of ten clustered *FvMRLK* genes indicated that gene duplications had occurred. Notably, group III was strawberry specific; no members from *Arabidopsis* were classified into this group, suggesting that this group of genes may have special roles in the regulation of growth and development in strawberry. As shown in Fig 5, among the 62 *FvMRLK* genes, 33 were found to be expressed primarily in fruits, and these fruit-expressed genes included some homologs of *FER*, *HERK1/2*, and *THE1* (i.e., *FvMRLK10*, *FvMRLK30*, and *FvMRLK47*). Except for *FvMRLK7* and *FvMRLK40*, nine genes from group III were not expressed in the fruits, possibly implying a special role of group III genes in the regulation of vegetative growth and development in strawberry.

### Universal roles of *FvMRLKs* in the regulation of plant growth and development

Ripening of fleshy fruits is a complex process that involves dramatic changes in color, firmness, flavor, and aroma [43, 45]. Strawberry is a model plant for the research of the non-climacteric fruits. Limited information is available on the mechanisms controlling fruit growth and development, especially for the non-climacteric fruits. A decrease in fruit firmness is a critical event in fruit ripening. Fruit firmness is essentially controlled by cell wall metabolism and the

decrease in fruit firmness primarily results from the breakdown of cellulose and pectin. The CrRLK1L protein kinases have been shown to function in cell wall metabolism [46–48]. Given the close relationship between cell wall metabolism and fruit ripening and the relationship between CrRLK1Ls and cell metabolism, CrRLK1Ls may be important regulators of fruit development and ripening. Consistent with this inference, in the present study, we had found that many *MRLK* genes were specifically and highly expressed in strawberry fruits (Fig 5). Interestingly, among the *MRLKs* expressed in the fruits, the expression profiles of more than two-thirds of the *MRLKs* were found to be tightly correlated with the progress of strawberry fruit development and ripening (Fig 6). It has been well established that strawberry fruit development and ripening is regulated by both internal and environmental cues [49]. We examined the expression of *MRLKs* in response to these cues, such as IAA, ABA, sucrose, temperature and dehydration stresses. As shown in Fig 7A, most of the genes examined were sensitive to low temperature treatment, for example, in response to low temperature treatment, the expression of *FvMRLK13* and *FvMRLK21* increased to more than 25 folds compared with the control. The expression of *FvMRLKs* were also found to be strongly regulated by the internal cues. Furthermore, whereas treatments of ABA and sucrose, two positive signals controlling strawberry fruit ripening [42,49,50], caused an increase in the expression of some genes, the treatment of IAA [51], negative signal of fruit ripening, contrarily caused a dramatic increase in the gene expression (Fig 7B). Collectively, these data implies a potential role of *MRLKs* in the regulation of strawberry fruit development and ripening.

FER, HERK1/2, ANX1/2, and THE1 are several representative proteins that have been functionally elucidated in the *CrRLK1L* gene family [31]. FER together with its two closest homologs ANX1/2, controls polarized cell growth, thereby playing a critical role in the regulation of pollen tube and root hair elongation [52, 53]. THE1 functions to mediate the responses of plant cells to the perturbation of cellulose synthesis [24]. Acting redundantly with THE1, HERK1/2 also functions to regulate cell elongation. FER, HERK1/2, ANX1/2, and THE1 may have important roles in universal biological processes. For example, FER might be implicated in ethylene biosynthesis [16], starch accumulation [17], seed development [18], vegetative growth [21, 23], mechanical signal transduction [54], and pathogen resistance [19, 20]. Given the importance of FER, HERK1/2, ANX1/2, and THE1, identification of their homologs in the strawberry genome is important for understanding the roles of *FvMRLKs* in regulating strawberry plant growth and development. As shown in Fig 3, phylogenetic analysis showed that the homologs of ANX1/2, *FvMRLK33*, and *FvMRLK34*, and the homologs of FER and *FvMRLK47*, are in group I. Three homologs of THE1, *FvMRLK10*, *FvMRLK26*, and *FvMRLK58*, and one homolog of HERK1, are in group II, implying the importance of members of group I and group II in the regulation of strawberry growth and development.

Analysis of the expression profiles of the *FvMRLK* genes indicated that more than 80% of the *FvMRLKs* were expressed in roots with transcript levels much higher than in other tissues, suggesting that *FvMRLKs* play a major role in the regulation of root growth and development (Fig 5). Further analysis showed that among the 62 *FvMRLK* genes, only 33 were expressed in the early stages of fruit development. Interestingly, among these 33 genes, the transcript levels of more than 20 genes were found to be dramatically decreased at advanced stages of fruit development. Strawberry fruit ripening is sensitive to both environmental and internal cues. Low temperature inhibits ripening, whereas high temperature promotes it. IAA, ABA, and sucrose are key signals controlling strawberry fruit ripening; thus, we examined the responses of some *FvMRLKs* to these compounds. As expected, the expression of many *FvMRLKs* was found to be sensitive to the environmental cues and the internal signals. These observations suggest that *FvMRLKs* play important roles in the regulation of strawberry fruit development and ripening.

Specific expression of a gene in a tissue or cell may imply that the gene plays a specific role in that tissue or cell. To identify the *FvMRLKs* implicated in strawberry fruit development and ripening, we hoped to identify *FvMRLKs* that were only expressed in fruits but not in other tissues. However, nearly all of the *FvMRLKs* that were expressed in fruits were also found to be expressed in other organs or tissues, especially in roots, although only about half of the *FvMRLKs* were expressed in the fruits. Assuming that some *FvMRLKs* are critical regulators of fruit development and ripening, these *FvMRLKs* may play different roles in different tissues or cells. This was demonstrated in a recent study. For example, OST1 is a key protein controlling stomatal movement and the ortholog of OST1 also plays a critical role in the regulation of strawberry fruit ripening. Similarly, while FER was found to play a critical role in the regulation of pollen tube growth and sperm release, it also plays a critical role in the regulation of root hair elongation as well as many other biological processes as described above. Based on the expression profile of the *FvMRLK* genes, further investigation is needed to establish how different *FvMRLKs* coordinately regulate a common biological process, and by contrast, how individual *FvMRLK* genes regulate distinct biological processes. Collectively, the present study provides valuable information about *FvMRLKs* in strawberry, and thereby casts light on the mechanisms underlying the regulation of fruit development and ripening in this model non-climacteric fruit.

## Conclusions

Sixty-two *FvMRLKs* were characterized in the strawberry genome, and classified these genes into six subfamilies with distinct malectin domains in the extracellular regions of the encoded proteins. More than 80% of the *FvMRLKs* were expressed in various tissues, with higher levels in roots than in other organs. Thirty-three *FvMRLKs* were expressed in fruits during the early stages of development, and over 60% of these exhibited dramatic decreases in expression during fruit growth and development. Moreover, the expression of some *FvMRLKs* was sensitive to both environmental and internal cues that play critical roles in regulating strawberry fruit development and ripening.

## Supporting Information

**S1 Table. Primer sequences used for qRT-PCR analyses.**  
(DOCX)

**S2 Table. List of 31 *FvMRLK* proteins containing a signal peptide.**  
(DOCX)

**S3 Table. *MRLK* genes identified in *Arabidopsis thaliana*.**  
(DOCX)

## Acknowledgments

This work was supported by the National Natural Science Foundation (31471851; 31672133; 31572104), the Scientific Research Program of Beijing Municipal Commission of Education (PXM2016-014207-000008; CEFF-PXM2016-014207-000038) and Fok Ying-Tong Education Foundation (151027).

## Author Contributions

**Conceptualization:** WJ LQ.



**Formal analysis:** QZ MJ.

**Funding acquisition:** WJ QZ BL.

**Investigation:** QZ MJ.

**Methodology:** QZ MJ.

**Project administration:** WJ LQ.

**Resources:** YX.

**Supervision:** WJ LQ.

**Validation:** QZ WJ MJ BL.

**Visualization:** WJ QZ BL.

**Writing – original draft:** WJ QZ.

**Writing – review & editing:** WJ QZ LQ BL.

## References

1. Shiu S H, Bleecker AB. Plant receptor-like kinase gene family: diversity, function, and signaling. *Sci STKE*. 2001;(113): re22. doi: [10.1126/stke.2001.113.re22](https://doi.org/10.1126/stke.2001.113.re22) PMID: [11752632](https://pubmed.ncbi.nlm.nih.gov/11752632/)
2. Torii KU. Leucine-rich repeat receptor kinases in plants: structure, function, and signal transduction pathways. *Int Rev Cytol*. 2004; 234:1–46. doi: [10.1016/S0074-7696\(04\)34001-5](https://doi.org/10.1016/S0074-7696(04)34001-5) PMID: [15066372](https://pubmed.ncbi.nlm.nih.gov/15066372/)
3. Shiu SH, Bleecker AB. Receptor-like kinases from Arabidopsis form a monophyletic gene family related to animal receptor kinases. *Proc Natl Acad Sci U S A*. 2001; 98 (19):10763–10768. doi: [10.1073/pnas.181141598](https://doi.org/10.1073/pnas.181141598) PMID: [11526204](https://pubmed.ncbi.nlm.nih.gov/11526204/)
4. Shiu SH, Bleecker AB. Expansion of the receptor-like kinase/Pelle gene family and receptor-like proteins in Arabidopsis. *Plant Physiol*. 2003; 132 (2):530–543. doi: [10.1104/pp.103.021964](https://doi.org/10.1104/pp.103.021964) PMID: [12805585](https://pubmed.ncbi.nlm.nih.gov/12805585/)
5. Schulze-Muth P, Irmier S, Schroder G, Schroder J. Novel type of receptor-like protein kinase from a higher plant (*Catharanthus roseus*). cDNA, gene, intramolecular autophosphorylation, and identification of a threonine important for auto- and substrate phosphorylation. *J Biol Chem*. 1996; 271 (43):26684–26689. PMID: [8900145](https://pubmed.ncbi.nlm.nih.gov/8900145/)
6. Wang X, Zafian P, Choudhary M, Lawton M. The PR5K receptor protein kinase from Arabidopsis thaliana is structurally related to a family of plant defense proteins. *Proc Natl Acad Sci U S A*. 1996; 93 (6): 2598–2602. doi: [10.1073/pnas.93.6.2598](https://doi.org/10.1073/pnas.93.6.2598) PMID: [8637920](https://pubmed.ncbi.nlm.nih.gov/8637920/)
7. Cheung AY, Wu HM. THESEUS 1, FERONIA and relatives: a family of cell wall-sensing receptor kinases? *Curr Opin Plant Biol*. 2011; 14 (6):632–641. doi: [10.1016/j.pbi.2011.09.001](https://doi.org/10.1016/j.pbi.2011.09.001) PMID: [21963060](https://pubmed.ncbi.nlm.nih.gov/21963060/)
8. Escobar-Restrepo JM, Huck N, Kessler S, Gagliardini V, Gheyselinck J, Yang WC, et al. The FERONIA receptor-like kinase mediates male-female interactions during pollen tube reception. *Science*. 2007; 317 (5838): 656–660. doi: [10.1126/science.1143562](https://doi.org/10.1126/science.1143562) PMID: [17673660](https://pubmed.ncbi.nlm.nih.gov/17673660/)
9. Huck N. The Arabidopsis mutant feronia disrupts the female gametophytic control of pollen tube reception. *Development*. 2003; 130 (10): 2149–2159. doi: [10.1242/dev.00458](https://doi.org/10.1242/dev.00458) PMID: [12668629](https://pubmed.ncbi.nlm.nih.gov/12668629/)
10. Duan Q, Kita D, Johnson EA, Aggarwal M, Gates L, Wu HM, et al. Reactive oxygen species mediate pollen tube rupture to release sperm for fertilization in Arabidopsis. *Nat Commun*. 2014; 5: 3129. doi: [10.1038/ncomms4129](https://doi.org/10.1038/ncomms4129) PMID: [24451849](https://pubmed.ncbi.nlm.nih.gov/24451849/)
11. Ngo QA, Vogler H, Lituiev DS, Nestorova A, Grossniklaus U. A calcium dialog mediated by the FERONIA signal transduction pathway controls plant sperm delivery. *Dev Cell*. 2014; 29 (4):491–500. doi: [10.1016/j.devcel.2014.04.008](https://doi.org/10.1016/j.devcel.2014.04.008) PMID: [24814317](https://pubmed.ncbi.nlm.nih.gov/24814317/)
12. Kessler SA, Lindner H, Jones DS, Grossniklaus U. Functional analysis of related CrRLK1L receptor-like kinases in pollen tube reception. *EMBO Rep*. 2015; 16 (1):107–115. doi: [10.15252/embr.201438801](https://doi.org/10.15252/embr.201438801) PMID: [25490905](https://pubmed.ncbi.nlm.nih.gov/25490905/)
13. Yu F, Qian L, Nibau C, Duan Q, Kita D, Levasseur K, et al. FERONIA receptor kinase pathway suppresses abscisic acid signaling in Arabidopsis by activating ABI2 phosphatase. *Proc Natl Acad Sci U S A*. 2012; 109 (36): 14693–14698. doi: [10.1073/pnas.1212547109](https://doi.org/10.1073/pnas.1212547109) PMID: [22908257](https://pubmed.ncbi.nlm.nih.gov/22908257/)

14. Duan Q, Kita D, Li C, Cheung AY, Wu HM. FERONIA receptor-like kinase regulates RHO GTPase signaling of root hair development. *Proc Natl Acad Sci U S A*. 2010; 107 (41):17821–17826. doi: [10.1073/pnas.1005366107](https://doi.org/10.1073/pnas.1005366107) PMID: [20876100](https://pubmed.ncbi.nlm.nih.gov/20876100/)
15. Huang GQ, Li E, Ge FR, Li S, Wang Q, Zhang CQ, et al. Arabidopsis RopGEF4 and RopGEF10 are important for FERONIA-mediated developmental but not environmental regulation of root hair growth. *New Phytol*. 2013; 200 (4):1089–1101. doi: [10.1111/nph.12432](https://doi.org/10.1111/nph.12432) PMID: [23915272](https://pubmed.ncbi.nlm.nih.gov/23915272/)
16. Mao D, Yu F, Li J, Van de Poel B, Tan D, Li J, et al. FERONIA receptor kinase interacts with S-adenosylmethionine synthetase and suppresses S-adenosylmethionine production and ethylene biosynthesis in Arabidopsis. *Plant Cell Environ*. 2015; 38 (12): 2566–2574. doi: [10.1111/pce.12570](https://doi.org/10.1111/pce.12570) PMID: [25988356](https://pubmed.ncbi.nlm.nih.gov/25988356/)
17. Yang T, Wang L, Li C, Liu Y, Zhu S, Qi Y, et al. Receptor protein kinase FERONIA controls leaf starch accumulation by interacting with glyceraldehyde-3-phosphate dehydrogenase. *Biochem Biophys Res Commun*. 2015; 465 (1):77–82. doi: [10.1016/j.bbrc.2015.07.132](https://doi.org/10.1016/j.bbrc.2015.07.132) PMID: [26232644](https://pubmed.ncbi.nlm.nih.gov/26232644/)
18. Yu F, Li J, Huang Y, Liu L, Li D, Chen L, et al. FERONIA receptor kinase controls seed size in Arabidopsis thaliana. *Mol Plant*. 2014; 7 (5):920–922. doi: [10.1093/mp/ssu010](https://doi.org/10.1093/mp/ssu010) PMID: [24482438](https://pubmed.ncbi.nlm.nih.gov/24482438/)
19. Keinath NF, Kierszniowska S, Lorek J, Bourdais G, Kessler SA, Shimosato-Asano H, et al. PAMP (pathogen-associated molecular pattern)-induced changes in plasma membrane compartmentalization reveal novel components of plant immunity. *J Biol Chem*. 2010; 285 (50):39140–39149. doi: [10.1074/jbc.M110.160531](https://doi.org/10.1074/jbc.M110.160531) PMID: [20843791](https://pubmed.ncbi.nlm.nih.gov/20843791/)
20. Kessler SA, Shimosato-Asano H, Keinath NF, Wuest SE, Ingram G, Panstruga R, et al. Conserved molecular components for pollen tube reception and fungal invasion. *Science*. 2010; 330 (6006):968–971. doi: [10.1126/science.1195211](https://doi.org/10.1126/science.1195211) PMID: [21071669](https://pubmed.ncbi.nlm.nih.gov/21071669/)
21. Guo H, Li L, Ye H, Yu X, Algreen A, Yin Y. Three related receptor-like kinases are required for optimal cell elongation in Arabidopsis thaliana. *Proc Natl Acad Sci U S A*. 2009; 106 (18):7648–7653. doi: [10.1073/pnas.0812346106](https://doi.org/10.1073/pnas.0812346106) PMID: [19383785](https://pubmed.ncbi.nlm.nih.gov/19383785/)
22. Guo H, Ye H, Li L, Yin Y. A family of receptor-like kinases are regulated by BES1 and involved in plant growth in Arabidopsis thaliana. *Plant Signal Behav*. 2009; 4 (8):784–786. doi: [10.1073/pnas.0812346106](https://doi.org/10.1073/pnas.0812346106) PMID: [19820315](https://pubmed.ncbi.nlm.nih.gov/19820315/)
23. Deslauriers SD, Larsen PB. FERONIA is a key modulator of brassinosteroid and ethylene responsiveness in Arabidopsis hypocotyls. *Mol Plant*. 2010; 3 (3):626–640. doi: [10.1093/mp/ssq015](https://doi.org/10.1093/mp/ssq015) PMID: [20400488](https://pubmed.ncbi.nlm.nih.gov/20400488/)
24. Hematy K, Sado PE, Van Tuinen A, Rochange S, Desnos T, Balzergue S, et al. A receptor-like kinase mediates the response of Arabidopsis cells to the inhibition of cellulose synthesis. *Curr Biol*. 2007; 17 (11): 922–931. doi: [10.1016/j.cub.2007.05.018](https://doi.org/10.1016/j.cub.2007.05.018) PMID: [17540573](https://pubmed.ncbi.nlm.nih.gov/17540573/)
25. Hematy K, Hofte H. Novel receptor kinases involved in growth regulation. *Curr Opin Plant Biol*. 2008; 11 (3):321–328. doi: [10.1016/j.pbi.2008.02.008](https://doi.org/10.1016/j.pbi.2008.02.008) PMID: [18395489](https://pubmed.ncbi.nlm.nih.gov/18395489/)
26. Boisson-Dernier A, Kessler SA, Grossniklaus U. The walls have ears: the role of plant CrRLK1Ls in sensing and transducing extracellular signals. *J Exp Bot*. 2011; 62 (5):1581–1591. doi: [10.1093/jxb/erq445](https://doi.org/10.1093/jxb/erq445) PMID: [21252257](https://pubmed.ncbi.nlm.nih.gov/21252257/)
27. Boisson-Dernier A, Roy S, Kritsas K, Grobei MA, Jaciubek M, Schroeder JI, et al. Disruption of the pollen-expressed FERONIA homologs ANXUR1 and ANXUR2 triggers pollen tube discharge. *Development*. 2009; 136 (19):3279–3288. doi: [10.1242/dev.040071](https://doi.org/10.1242/dev.040071) PMID: [19736323](https://pubmed.ncbi.nlm.nih.gov/19736323/)
28. Schallus T, Jaeckh C, Feher K, Palma AS, Liu Y, Simpson JC, et al. Malectin: a novel carbohydrate-binding protein of the endoplasmic reticulum and a candidate player in the early steps of protein N-glycosylation. *Mol Biol Cell*. 2008; 19 (8): 3404–3414. doi: [10.1091/mbc.E08-04-0354](https://doi.org/10.1091/mbc.E08-04-0354) PMID: [18524852](https://pubmed.ncbi.nlm.nih.gov/18524852/)
29. Schallus T, Feher K, Sternberg U, Rybin V, Muhle-Goll C. Analysis of the specific interactions between the lectin domain of malectin and diglucosides. *Glycobiology*. 2010; 20 (8):1010–1020. doi: [10.1093/glycob/cwq059](https://doi.org/10.1093/glycob/cwq059) PMID: [20466650](https://pubmed.ncbi.nlm.nih.gov/20466650/)
30. Takeda K, Qin SY, Matsumoto N, Yamamoto K. Association of malectin with ribophorin I is crucial for attenuation of misfolded glycoprotein secretion. *Biochem Biophys Res Commun*. 2014; 454 (3):436–440. doi: [10.1016/j.bbrc.2014.10.102](https://doi.org/10.1016/j.bbrc.2014.10.102) PMID: [25451265](https://pubmed.ncbi.nlm.nih.gov/25451265/)
31. Lindner H, Muller LM, Boisson-Dernier A, Grossniklaus U. CrRLK1L receptor-like kinases: not just another brick in the wall. *Curr Opin Plant Biol*. 2012; 15 (6):659–669. doi: [10.1016/j.pbi.2012.07.003](https://doi.org/10.1016/j.pbi.2012.07.003) PMID: [22884521](https://pubmed.ncbi.nlm.nih.gov/22884521/)
32. Nguyen QN, Lee YS, Cho LH, Jeong HJ, An G, Jung KH. Genome-wide identification and analysis of Catharanthus roseus RLK1-like kinases in rice. *Planta*. 2015; 241 (3):603–613. doi: [10.1007/s00425-014-2203-2](https://doi.org/10.1007/s00425-014-2203-2) PMID: [25399351](https://pubmed.ncbi.nlm.nih.gov/25399351/)
33. Niu E, Cai C, Zheng Y, Shang X, Fang L, Guo W. Genome-wide analysis of CrRLK1L gene family in Gossypium and identification of candidate CrRLK1L genes related to fiber development. *Mol Genet Genomics*. 2016; doi: [10.1007/s00438-016-1169-0](https://doi.org/10.1007/s00438-016-1169-0) PMID: [26833484](https://pubmed.ncbi.nlm.nih.gov/26833484/)

34. Petersen TN, Brunak S, Heijne G, Nielsen H. SignalP 4.0: discriminating signal peptides from transmembrane regions. *Nat Methods*. 2011; 8(10):785–786. doi: [10.1038/nmeth.1701](https://doi.org/10.1038/nmeth.1701) PMID: [21959131](https://pubmed.ncbi.nlm.nih.gov/21959131/)
35. Larkin MA, Blackshields G, Brown NP, Chenna R, McGettigan PA, McWilliam H, et al. Clustal W and Clustal X version 2.0. *Bioinformatics*. 2007; 23 (21):2947–2948. doi: [10.1093/bioinformatics/btm404](https://doi.org/10.1093/bioinformatics/btm404) PMID: [17846036](https://pubmed.ncbi.nlm.nih.gov/17846036/)
36. Tamura K, Peterson D, Peterson N, Stecher G, Nei M, Kumar S. MEGA5: molecular evolutionary genetics analysis using maximum likelihood, evolutionary distance, and maximum parsimony methods. *Mol Biol Evol*. 2011; 28 (10): 2731–2739. doi: [10.1093/molbev/msr121](https://doi.org/10.1093/molbev/msr121) PMID: [21546353](https://pubmed.ncbi.nlm.nih.gov/21546353/)
37. Voorrips RE. MapChart: Software for the graphical presentation of linkage maps and QTLs. *J Hered*. 2002; 93(1), 77–78. doi: [10.1093/jhered/93.1.77](https://doi.org/10.1093/jhered/93.1.77) PMID: [12011185](https://pubmed.ncbi.nlm.nih.gov/12011185/)
38. Rambaldi D, Ciccarelli FD. Fancy Gene: dynamic visualization of gene structures and protein domain architectures on genomic loci. *Bioinformatics*. 2009; 25 (17):2281–2282. doi: [10.1093/bioinformatics/btp381](https://doi.org/10.1093/bioinformatics/btp381) PMID: [19542150](https://pubmed.ncbi.nlm.nih.gov/19542150/)
39. Bailey TL, Boden M, Buske FA, Frith M, Grant CE, Clementi L, et al. MEME SUITE: tools for motif discovery and searching. *Nucleic Acids Res*. 2009; 37 (Web Server issue):W202–208. doi: [10.1093/nar/gkp335](https://doi.org/10.1093/nar/gkp335) PMID: [19458158](https://pubmed.ncbi.nlm.nih.gov/19458158/)
40. Holub EB. The arms race is ancient history in Arabidopsis, the wildflower. *Nat Rev Genet*. 2001; 2:516–527. doi: [10.1038/35080508](https://doi.org/10.1038/35080508) PMID: [11433358](https://pubmed.ncbi.nlm.nih.gov/11433358/)
41. Cannon SB, Mitra A, Baumgarten A, Young ND, May G. The roles of segmental and tandem gene duplication in the evolution of large gene families in Arabidopsis thaliana. *BMC Plant Biol*. 2004; 4, 10. doi: [10.1186/1471-2229-4-10](https://doi.org/10.1186/1471-2229-4-10) PMID: [15171794](https://pubmed.ncbi.nlm.nih.gov/15171794/)
42. Jia H, Wang Y, Sun M, Li B, Han Y, Zhao Y, et al. Sucrose functions as a signal involved in the regulation of strawberry fruit development and ripening. *New Phytol*. 2013; 198 (2):453–65. doi: [10.1111/nph.12176](https://doi.org/10.1111/nph.12176) PMID: [23425297](https://pubmed.ncbi.nlm.nih.gov/23425297/)
43. Seymour GB, Østergaard L, Chapman NH, Knapp S, Martin C. Fruit development and ripening. *Annu Rev Plant Biol*. 2013; 64: 219–241. doi: [10.1146/annurev-arplant-050312-120057](https://doi.org/10.1146/annurev-arplant-050312-120057) PMID: [23394500](https://pubmed.ncbi.nlm.nih.gov/23394500/)
44. Shulaev V, Sargent DJ, Crowhurst RN, Mockler TC, Folkerts O, Delcher AL, et al. The genome of woodland strawberry (*Fragaria vesca*). *Nat Genet*. 2011; 43 (2), 109–16. doi: [10.1038/ng.740](https://doi.org/10.1038/ng.740) PMID: [21186353](https://pubmed.ncbi.nlm.nih.gov/21186353/)
45. Giovannoni J. MOLECULAR BIOLOGY OF FRUIT MATURATION AND RIPENING. *Annu Rev Plant Physiol Plant Mol Biol*. 2001; 52:725–749. doi: [10.1146/annurev.arplant.52.1.725](https://doi.org/10.1146/annurev.arplant.52.1.725) PMID: [11337414](https://pubmed.ncbi.nlm.nih.gov/11337414/)
46. Haruta M, Sabat G, Stecker K, Minkoff BB, Sussman MR. A peptide hormone and its receptor protein kinase regulate plant cell expansion. *Science*. 2014; 343 (6169): 408–411. doi: [10.1126/science.1244454](https://doi.org/10.1126/science.1244454) PMID: [24458638](https://pubmed.ncbi.nlm.nih.gov/24458638/)
47. Li S, Zhang Y. To grow or not to grow: FERONIA has her say. *Mol Plant*. 2014; 7 (8): 1261–1263. doi: [10.1093/mp/ssu031](https://doi.org/10.1093/mp/ssu031) PMID: [24646631](https://pubmed.ncbi.nlm.nih.gov/24646631/)
48. Wolf S, Hofte H. Growth Control: A Saga of Cell Walls, ROS, and Peptide Receptors. *Plant Cell*. 2014; 26 (5):1848–1856. doi: [10.1105/tpc.114.125518](https://doi.org/10.1105/tpc.114.125518) PMID: [24808052](https://pubmed.ncbi.nlm.nih.gov/24808052/)
49. Han Y, Dang R, Li J, Jiang J, Zhang N, Jia M, et al. SUCROSE NONFERMENTING1-RELATED PROTEIN KINASE2.6, an ortholog of OPEN STOMATA1, is a negative regulator of strawberry fruit development and ripening. *Plant Physiol*. 2015; 167 (3):915–930. doi: [10.1104/pp.114.251314](https://doi.org/10.1104/pp.114.251314) PMID: [25609556](https://pubmed.ncbi.nlm.nih.gov/25609556/)
50. Aharoni A, Keizer LC, Van Den Broeck HC, Blanco-Portales R, Munoz-Blanco J, Bois G, et al. Novel insight into vascular, stress, and auxin-dependent and -independent gene expression programs in strawberry, a non-climacteric fruit. *Plant Physiol*. 2002; 129 (3):1019–1031. doi: [10.1104/pp.003558](https://doi.org/10.1104/pp.003558) PMID: [12114557](https://pubmed.ncbi.nlm.nih.gov/12114557/)
51. Given NK, Venis MA, Gierson D. Hormonal regulation of ripening in the strawberry, a non-climacteric fruit. *Planta*. 1988; 174(3):402–406. doi: [10.1007/BF00959527](https://doi.org/10.1007/BF00959527) PMID: [24221523](https://pubmed.ncbi.nlm.nih.gov/24221523/)
52. Miyazaki S, Murata T, Sakurai-Ozato N, Kubo M, Demura T, Fukuda H, et al. ANXUR1 and 2, sister genes to FERONIA/SIRENE, are male factors for coordinated fertilization. *Curr Biol*. 2009; 19 (15):1327–1331. doi: [10.1016/j.cub.2009.06.064](https://doi.org/10.1016/j.cub.2009.06.064) PMID: [19646876](https://pubmed.ncbi.nlm.nih.gov/19646876/)
53. Kanaoka MM, Torii KU. FERONIA as an upstream receptor kinase for polar cell growth in plants. *Proc Natl Acad Sci U S A*. 2010; 107 (41):17461–17462. doi: [10.1073/pnas.1013090107](https://doi.org/10.1073/pnas.1013090107) PMID: [20926748](https://pubmed.ncbi.nlm.nih.gov/20926748/)
54. Shih HW, Miller ND, Dai C, Spalding EP, Monshausen GB. The receptor-like kinase FERONIA is required for mechanical signal transduction in Arabidopsis seedlings. *Curr Biol*. 2014; 24 (16):1887–1892. doi: [10.1016/j.cub.2014.06.064](https://doi.org/10.1016/j.cub.2014.06.064) PMID: [25127214](https://pubmed.ncbi.nlm.nih.gov/25127214/)
